# Supplementary material for: Detecting signals of seasonal influenza severity through age dynamics
Source: BMC Infect Dis. 2015 Dec 29;15:587. doi: 10.1186/s12879-015-1318-9 (PMC4696185; doi:10.1186/s12879-015-1318-9)
Supplement: Additional file 2 — Historical CDC documentation of past influenza seasons. Table of qualitatively-assigned severity categories and surveillance system text descriptions drawn from Centers for Disease Control and Prevention (CDC) influenza season summaries and Morbidity and Mortality Weekly Reports (MMWR) for the 1997–98 through 2013–14 flu seasons. Severity categories were assigned according to the algorithm described in Additional file 1: Supporting material section S3.1. (XLSX 23 kb) [file 12879_2015_1318_MOESM2_ESM.xlsx]

## Sheet: cover page
Detecting signals of seasonal influenza severity through age dynamics	Additional file 2 --- Historical CDC documentation of past influenza seasons
Description: Table of surveillance system text descriptions drawn from Centers for Disease Control and Prevention (CDC) influenza season summaries and Morbidity and Mortality Weekly Reports (MMWRs) for the 1997-98 through 2013-14 flu seasons. These descriptions were qualitatively coded as part of the algorithm to set benchmark thresholds for severity classifications.
Additional notes: Cells filled black had no available data. Precise severity descriptions in the “Synopsis” were assumed to be true (step 1 of algorithm). Texts related to “Positive lab tests”, “P&I mortality”, “Peak ILI visits”, “Regional spread”, “Pediatric deaths”, “Hospitalizations – children”, and “Hospitalizations – adults” were tallied as falling below, within, or above the CDC-reported ra…

## Sheet: content
Season	Severity category	Synopsis	Positive lab tests	P&I mortality	Peak ILI visits	Regional spread	Pediatric deaths	Hospitalizations – children	Hospitalizations – adults	CDC Source
1997-98	not enough data on prior seasons	The findings indicate that this season has been dominated by influenza A(H3N2) viruses and characterized by a sustained elevation in pneumonia and influenza (P&I)-related deaths.	During the 1997--98 influenza season, the number of isolates reported by WHO and NREVSS collaborating laboratories peaked during the week ending January 31, 1998 (week 4), when 28% of specimens tested for respiratory viruses were positive for influenza.	From October 4, 1997, through May 23, 1998, the percentage of deaths attributed to P&I exceeded the epidemic threshold for 13 of the 34 weeks and peaked at 9.8% for the week ending January 24, 1998 (week 3) (Figure 3). P&I deaths exceeded the epidemic threshold for 10 consecutive weeks, from January 3 through March 14, 1998 (weeks 1—10).	Visits to sentinel physicians for ILI exceeded baseline levels (0%--3%) nationally for 7 consecutive weeks, from the week ending January 3, 1997 (week 53), through the week ending February 14, 1998 (week 6) (Figure 4). The percentage of visits for ILI peaked at 5% during the weeks ending January 24, January 31, and February 7, 1998 (weeks 3—5).	Influenza activity increased steadily during January and peaked during the weeks ending January 31 and February 7, 1998 (weeks 4 and 5), when 45 states reported regional or widespread activity.				“Surveillance for Influenza --- United States, 1997-98, 1998-99, and 1999-00 Seasons.” (October 25, 2002). MMWR 51(SS07); 1-10. “Update: Influenza Activity --- United States, 1997-98 Season.” (March 20, 1998). MMWR 47(10); 196-200.
1998-99	not enough data on prior seasons		The number and proportion of respiratory specimens testing positive for influenza increased during December 1998--February 1999 and peaked during the week ending February 13, 1998 (week 6), when 28% of specimens tested for influenza were positive.	For 1998--99, the percentage of deaths attributed to P&I exceeded the epidemic threshold for 18 of the 33 weeks and peaked at 9.7% during the week ending March 13, 1999 (week 10) (Figure 3). The longest duration in which this percentage was above the epidemic threshold was 12 consecutive weeks, from January 30 through April 17, 1999 (weeks 4—15).	The percentage of patient visits to sentinel physicians for ILI exceeded baseline levels (0%--3%) for 7 consecutive weeks, from January 22 through the week ending March 6, 1999 (weeks 3--9) (Figure 4). Patient visits for ILI peaked at 5% during the weeks ending February 6 through February 20, 1999 (weeks 5—7).	Influenza activity peaked during the week ending February 20, 1998 (week 7), when 43 states reported regional or widespread activity. Both regional and widespread activity were last reported for the week ending May 8, 1998 (week 18).				“Surveillance for Influenza --- United States, 1997-98, 1998-99, and 1999-00 Seasons.” (October 25, 2002). MMWR 51(SS07); 1-10. “Update: Influenza Activity --- United States, 1998-99 Season.” (March 12, 1999). MMWR 48(09); 177-181.
1999-00	Moderate		The percentage of respiratory specimens testing positive for influenza viruses peaked at 33% during mid to late December. During the previous 3 influenza seasons (1996-97, 1997-98, 1998-99), the peak percentages of respiratory specimens testing positive for influenza viruses ranged from 28% to 34%.	The proportion of deaths attributed to P&I peaked at 11.2% in mid-January. During the previous 3 influenza seasons, peak P&I mortality levels ranged between 8.8% and 9.1%. This season's P&I figures must be interpreted with caution because important changes have taken place in the case definition that may be contributing to higher estimates of P&I mortality than in previous years.	The percentage of overall patient visits for ILI during the 1999-2000 seasons peaked at 6% in late December. During the previous 3 influenza seasons, the peak percentages of patient visits for ILI ranged between 5% and 7%.	Peak influenza activity occurred during mid-January when 44 states reported either regional or widespread influenza activity.				CDC influenza season summary
2000-01	Mild	The 2000-01 influenza season was mild in the US and was the first seasons since 1995-96 that influenza A (H3N2) viruses did not predominate.	The percentage of respiratory specimens testing positive for influenza viruses peaked at 24% during mid to late January. During the previous 3 influenza seasons (1997-98, 1998-99, 1999-2000), the peak percentages of respiratory specimens testing positive for influenza viruses ranged from 28% to 32%.	The proportion of deaths attributed to P&I did not exceed the epidemic threshold during this season.	The percentage of patient visits for ILI peaked at 4% for 4 consecutive weeks during mid-January and early February. During the previous 3 influenza seasons, the peak percentage of patient visits for ILI ranged between 5% and 7%.	Activity peaked during late January and early February, when 38 states reported regional or widespread influenza activity.				CDC influenza season summary
2001-02	Moderate	The 2001-02 season was mild to moderate and influenza A (H3N2) viruses predominated.	Nationwide, the percentage of respiratory specimens testing positive peaked at 26% during the week ending February 23, 2002. During the previous 3 influenza seasons (1998-99, 1999-2000, 2000-01), the peak percentage of respiratory specimens testing positive for flu viruses ranged from 23% to 31%.	The percentage of P&I deaths was above the epidemic threshold for 5 consecutive weeks (week ending March 2 through week ending March 30) and peaked at 9.1% during the week ending March 16. During the 1998-99 and 1999-2000 seasons, the percentage of deaths attributed to P&I was above the epidemic threshold for 12 and 13 consecutive weeks, respectively, but did not exceed the epidemic threshold dur…	Nationally, influenza morbidity as reported by sentinel physicians peaked at 3.2% during the week ending February 16. During the previous 3 influenza seasons, the peak percentage of patient visits for ILI ranged between 4% and 6%.	Activity peaked during mid-Feb, when 40 states reported regional or widespread activity. The peak number of states reporting regional or widespread activity during the previous 3 years ranged from 38 to 44. During the 2001-02 season, state and territorial epidemiologists reported regional flu activity during 25 consecutive weeks from the week ending Nov 17 through the week ending May 4. Widesprea…				CDC influenza season summary
2002-03	Mild	The 2002-03 season was mild; A(H1) and B viruses circulated widely, and the predominant virus varied by region and time of season.	Nationwide, the percentage of respiratory specimens testing positive peaked at 24.7% during the week ending February 8, 2003. The peak percentage of specimens testing positive during the previous 3 seasons (1999-2000, 2000-01, 2001-02), ranged from 23% to 31%.	The percentage of P&I deaths peaked during the week ending March 1, but did not exceed the epidemic threshold during the 2002-03 season. During the 1999-2000, 2000-01, 2001-02 seasons, the number of consecutive weeks during which the percentage of deaths attributed to P&I was above the epidemic threshold ranged from 0 to 13 weeks.	Nationally, morbidity exceed baseline levels (0-1.9%) during the week ending December 28, 2992 and each consecutive week during the weeks ending January 25- March 1, 2003. The peak percentage of patient visits for ILI was 3.2% during the week ending February 8. During the previous 3 seasons, the peak percentage of patient visits for ILI ranged between 3.2% and 5.7%.	Activity peaked during late Feb when 35 states reported regional or widespread influenza activity. The peak number of states reporting regional or widespread activity during the previous 3 years ranged from 38 to 44. During the 2002-03 season, one or more states reported regional influenza activity during 30 consecutive weeks from the week ending Oct 26, 2002 through the week ending May 17, 2003.…				CDC influenza season summary
2003-04	Severe	The 2003-04 U.S. influenza season began earlier than most seasons and was moderately severe; influenza A (H1), A (H3N2), and B viruses co-circulated, and the predominant strain was influenza A (H3N2).	Nationwide, the percentage of respiratory specimens testing positive for influenza peaked at 35.2% during the week ending November 29, 2003; however, the largest number of isolates was reported during the week ending December 13. The peak percentage of specimens testing positive for influenza during the previous 4 seasons (1999-00, 2000-01, 2001-02, and 2002-03) ranged from 23% to 31%.	The percentage of P&I deaths in the United States peaked at 10.3% during the weeks ending January 10-17 and exceeded the epidemic threshold for 9 consecutive weeks during the 2003-04 season. During the previous 4 seasons, the number of consecutive weeks during which the percentage of deaths attributed to P&I was above the epidemic threshold ranged from 0 to 17 weeks.	Nationally, influenza morbidity as reported by U.S. sentinel physicians exceeded baseline levels (2.5%) for 9 consecutive weeks from the week ending November 15, 2003 to January 10, 2004. The peak percentage of patient visits for influenza-like illness (ILI) was 7.6% during the week ending December 27, 2003. During the previous 4 influenza seasons, the national peak percentage of patient visits f…	The influenza activity level definitions changed for the 2003-04 influenza season to include the addition of a local activity level (previously categorized as regional). Influenza activity peaked during late December, when 50 states reported local, regional, or widespread influenza activity. The peak number of states reporting regional or widespread activity during the previous 4 seasons ranged f…				CDC influenza season summary
2004-05	Moderate	During the 2004-05 U.S. season, influenza activity occurred at low levels from October to mid-December, steadily increased during January and peaked in mid-February. Influenza A (H3N2) viruses predominated but influenza A (H1) and B viruses also circulated.	Nationwide, the percentage of respiratory specimens testing positive for influenza viruses peaked at 27.0% during the week ending February 5, 2005 (week 5); however, the largest number of isolates was reported during the week ending February 19 (week 7). The peak percentage of specimens testing positive for influenza viruses during the previous 4 seasons (2000-01, 2001-02, 2002-03, and 2003-04) r…	The proportion of deaths in the United States attributed to pneumonia and influenza (P&I) exceeded the epidemic threshold¥ during 10 consecutive weeks (weeks ending February 19-April 23, 2005). The percentage of P&I deaths reached a peak of 8.9% during the week ending March 5, 2005 (week 9) and stayed above the threshold through the week ending April 23, 2005 (week 16). During the previous 4 infl…	Nationally, the percentage of outpatient visits for ILI reported by U.S. sentinel healthcare providers exceeded baseline levels (2.5%)†† during the week ending January 1 (week 52) and for 11 consecutive weeks during the weeks ending January 15-March 26, 2005 (weeks 2-12). ILI peaked at 5.4% during the week ending February 19, 2005 (week 7). During the previous 4 influenza seasons, the peak percen…	influenza activity peaked during the week ending February 19 (week 7) when 15 states reported regional influenza activity and 33 reported widespread activity. The peak number of states reporting regional or widespread activity during the previous 4 seasons ranged from 35 to 50. Widespread activity was reported by one or more states for 18 consecutive weeks from the week ending December 11 (week 4…	In October 2004, influenza-associated pediatric deaths became nationally notifiable. As of July 6, 39 pediatric deaths had been reported to CDC from 17 states (California, Colorado, Florida, Georgia, Iowa, Maine, Maryland, Massachusetts, Michigan, Mississippi, Nevada, New Jersey, New York, Ohio, Pennsylvania, Vermont, and Virginia) and New York City during the 2004-05 influenza season. All deaths…	The 2004-05 season was the first influenza season to integrate laboratory-confirmed pediatric hospitalization rates into the weekly influenza update. During October 3, 2004-April 30, 2005, the preliminary influenza-associated hospitalization rate for children 0-4 years old reported by NVSN and EIP was 7.0 and 3.2 per 10,000, respectively. EIP also monitors hospitalizations in children aged 5-17 y…		CDC influenza season summary
2005-06	Mild	Nationally, activity was low from October through early January, increased during February, and peaked in early March. Peak activity was less intense, but activity remained elevated for a longer period of time this season compared to the previous three seasons. The longer period of elevated activity may be due in part to regional differences in the timing of peak activity and intensity of influen…	Nationwide, the percentage of respiratory specimens testing positive for influenza viruses peaked at 22.7% during the week ending March 11, 2006 (week 10) and activity remained elevated (more than 10% of specimens tested were positive for influenza) for 18 weeks. During the previous 3 seasons (2002-03, 2003-04, and 2004-05), the peak percentage of specimens testing positive for influenza viruses …	The proportion of deaths attributed to P&I peaked twice at 7.8%, once during the week ending January 14, 2006 (week 2), and again during the week ending March 18, 2006 (week 11), but did not exceed the epidemic threshold. During the previous 3 influenza seasons, the peak percentage of P&I deaths ranged from 8.5% to 10.4% and the total number of weeks above epidemic threshold ranged from 4 to 10.	Nationally, the percentage of outpatient visits for ILI reported by U.S. sentinel providers peaked twice, once at 3.3% during the week ending December 31, 2005 (week 52), and again at 3.2% during the week ending March 4, 2006 (week 9), and exceeded baseline levels (2.2%) for 16 consecutive weeks. During the previous 3 influenza seasons, the peak percentage of patient visits for ILI ranged from 2.…	influenza activity nationwide peaked during the week ending March 11, 2006 (week 10) when 25 states reported widespread influenza activity and 16 reported regional influenza activity. The peak number of states reporting widespread or regional activity during the previous 3 seasons ranged from 35 to 50. The peak number of states in the western-most regions reporting widespread or regional activity…	During October 2, 2005 through June 24, 2006, 41 pediatric deaths have been reported to CDC from 14 states. Four of the deaths reported during this time period occurred prior to the 2005-06 influenza season. Due to the length of time this system has been in place, and because state participation may vary, it is not feasible to compare the number of deaths from season-to-season.	During October 1, 2005 – April 30, 2006, the preliminary influenza-associated hospitalization rate reported by EIP for children aged 0-17 years was 1.3 per 10,000. For children aged 0-4 years and 5-17 years, the rate was 3.1 per 10,000 and 0.4 per 10,000, respectively. During October 30, 2005 – April 29, 2006, the preliminary laboratory-confirmed influenza-associated hospitalization rate for chil…		CDC influenza season summary
2006-07	Mild	During the 2006-07 season, influenza A (H1) viruses were most commonly isolated, but influenza A (H3) viruses were more frequently identified than influenza A (H1) viruses from early March through May. A small number of influenza B viruses were also identified. Nationally, low levels of influenza activity were reported during October through mid-December, increased during January, and peaked in m…	The proportion of specimens testing positive for influenza first exceeded 10% during the week ending December 23, 2006 (week 51), peaked at 28.0% during the week ending February 10, 2007 (week 6), and declined to <10% during the week ending April 28, 2007 (week 17). Fourteen consecutive weeks were above 10% positive. The peak percentage of specimens testing positive for influenza during the previ…	The proportion of deaths in the United States attributed to pneumonia and influenza (P&I) as reported by the 122 Cities Mortality Reporting System peaked three times, once at 7.5% during the week ending January 20, 2007 (week 3), once at 7.7% during the week ending February 24, 2007 (week 8), and again at 7.5% during the week ending March 24, 2007 (week 12), but did not exceed the epidemic thresh…	The weekly percentage of patient visits to U.S. sentinel providers for ILI exceeded or was at baseline levels (2.1%)** during the weeks ending December 16, 2006–March 24, 2007 (weeks 50-12) and peaked twice, once at 3.0% for the week ending December 30, 2006 (week 52), and again at 3.5% for the week ending February 17, 2007 (week 7). The increase in the percentage of patient visits for ILI during…	The geographic distribution of influenza activity peaked during the week ending February 24, 2007 (week 8), when 25 states reported widespread activity and 19 states reported regional activity. Forty-one states reported widespread influenza activity at least once during the 2006-07 season. The peak number of states reporting widespread or regional activity during the previous three seasons has ra…	As of August 6, 2007, among persons aged <18 years, a total of 68 deaths associated with influenza infections occurring during October 1, 2006-May 19, 2007, were reported to CDC. Of these, 10 were <6 months, 10 were 6-23 months, 9 were 2-4 years, and 39 were 5-17 years of age. Of the 63 cases for which the influenza virus type was known, 47 were influenza A and 16 were influenza B viruses. Of the…	During October 1, 2006–April 28, 2007, the preliminary influenza-associated hospitalization rate reported by EIP for children aged 0-17 years was 0.81 per 10,000. For children aged 0-4 years and 5-17 years, the rate was 1.62 per 10,000 and 0.23 per 10,000, respectively. During November 5, 2006–May 26, 2007, the preliminary laboratory-confirmed influenza-associated hospitalization rate for childre…		CDC influenza season summary
2007-08	Moderate	During the 2007--2008 season, influenza activity peaked in mid-February and was associated with greater overall mortality, and higher rates of hospitalizations among children aged 0-4 years compared with each of the previous three seasons.	The proportion of specimens testing positive for influenza first exceeded 10% during the week ending January 12, 2008 (week 2), peaked at 32% during the week ending February 9, 2008 (week 6), and declined to < 10% during the week ending April 19, 2008 (week 16). The proportion was above 10% positive for 14 consecutive weeks. The peak percentage of specimens testing positive for influenza during t…	The percentage of deaths attributed to pneumonia and influenza (P&I) exceeded the epidemic threshold for 8 consecutive weeks during the weeks ending January 12--May 17, 2008 (weeks 9--16). The percentage of P&I deaths peaked at 9.1% during the week ending March 15, 2008 (week 11). During the previous three influenza seasons, the peak percentage of P&I deaths has ranged from 7.7% to 8.9% and the t…	The weekly percentage of patient visits to U.S. sentinel providers for influenza-like illness (ILI)§ met or exceeded national baseline levels (2.2%)§§ during the weeks ending December 29, 2007--March 22, 2008 (weeks 52--12) and peaked at 6.0% for the week ending February 16, 2008 (week 7). During the previous three influenza seasons, the peak percentage of patient visits for ILI ranged from 3.2% …	The geographic distribution of influenza activity peaked during the weeks ending February 16 and February 23, 2008 (weeks 7 and 8), when 49 states reported widespread activity and one state reported regional activity. All 50 states reported widespread influenza activity for at least two weeks during the 2007-08 season. The peak number of states reporting widespread or regional activity during the…	As of June 19, 2008, 83 deaths associated with laboratory-confirmed influenza infections have occurred among children aged < 18 years during the 2007--08 influenza season that were reported to CDC. Among the 83 cases, the mean and median age was 6.4 years and 5.0 years, respectively; seven children were aged < 6 months, 16 were aged 6--23 months, 18 were aged 2--4 years, and 42 were aged 5--17 ye…	During September 30, 2007--May 3, 2008, the preliminary influenza-associated hospitalization rate reported by EIP for children aged 0-17 years was 1.53 per 10,000. For children aged 0--4 years and 5--17 years, the rate was 4.03 per 10,000 and 0.55 per 10,000, respectively. During November 4, 2007--May 3, 2008, the preliminary laboratory-confirmed influenza-associated hospitalization rate for chil…		CDC influenza season summary
2008-09	Moderate	During the 2008-09 influenza season, low levels of influenza activity were reported from October through early January. Activity increased from mid-January and peaked in mid-February.	The percentage of specimens testing positive for influenza first exceeded the seasonal threshold of 10% during the week ending January 17, 2009, and peaked at 25.0% during the week ending February 14, 2009. For the week ending April 18, 2009, 7.2% of specimens tested for influenza were positive.	From September 28, 2008 to April 18, 2009, the weekly percentage of deaths attributed to pneumonia and influenza ranged from 6.1% to 7.9%, and was elevated above the epidemic threshold for only one week (week ending April 11, 2009, week 14).	The weekly percentage of outpatient visits for influenza-like illness (ILI) to the U.S. Outpatient Influenza-like Illness Surveillance Network (ILINet) ranged from 1.0% during the week ending October 18, 2008 (week 42), to 3.5% for the week ending February 14, 2009 (week 6) and was at or exceeded the national baseline (2.4%) for eight consecutive weeks, weeks 4—11.	The geographic distribution of influenza activity was most extensive during the week ending March 7, 2009 (week 9), when 35 jurisdictions reported widespread influenza activity and 14 states reported regional influenza activity. Regional or widespread influenza activity has been reported during at least one week by 49 states and Puerto Rico.	From September 28, 2008, to April 18, 2009, 67 deaths associated with laboratory-confirmed influenza infections occurring among children aged <18 years were reported to CDC. Nine children were aged < 6 months, nine were aged 6-23 months, eight were aged 2-4 years, 17 were aged 5-11 years, and 24 were aged 12-17 years.	From October 1, 2008, to April 11, 2009, preliminary rates of laboratory-confirmed influenza-associated hospitalization reported by the EIP for children aged 0--4 years and 5--17 years were 34.6 and 6.4 per 100,000, respectively. From October 12, 2008 to April 4, 2009, the preliminary laboratory-confirmed influenza-associated hospitalization rate for children 0-4 years old in the NVSN was 2.87 pe…	For adults aged 18--49 years, 50--64 years, and =65 years, the rates were 3.6, 4.8, and 13.5 per 100,000, respectively.	CDC influenza season summary
2010-11	Moderate	Compared with the previous influenza season (2009—10, including the pandemic), a higher rate of hospitalization was observed for persons aged ≥65 years during the 2010--11 season; however lower hospitalization rates were observed in younger populations than during the pandemic year. Overall, the percentages of outpatient visits for influenza-like illness (ILI) were lower during the 2010--11 seaso…	The proportion of specimens testing positive for influenza during the 2010--11 season first exceeded 10% during the week ending November 27, 2010, indicating higher levels of virus circulation. The proportion peaked at 36% during the week ending February 5, 2011, and declined to <10% during the week ending April 16, 2011. Although influenza A (H3N2) viruses predominated, 2009 influenza A (H1N1) a…	the percentage of deaths attributed to pneumonia and influenza (P&I) exceeded the epidemic threshold for 13 consecutive weeks, during the weeks ending January 29 to April 23, 2011 (weeks 4--16). The percentage of deaths attributed to P&I peaked at 9.0% during the week ending February 12, 2011 (week 6). From the 2007--08 season through the 2009--10 season, the peak percentage of deaths attributed …	(ILINet) exceeded national baseline levels (2.5%) during the weeks ending December 25, 2010, through March 19, 2011 (weeks 51--11), and peaked at 4.5% during the week ending February 19, 2011 (week 7). During the two influenza seasons before the pandemic (2007--08 and 2008--09), the peak percentage of patient visits for ILI ranged from 3.5% to 6.0% and occurred during mid- to late February. Durin…	The geographic distribution of influenza activity was most extensive during the week ending February 26, 2011 (week 8), when 44 jurisdictions reported widespread influenza activity and five states reported regional influenza activity. The peak number of jurisdictions reporting widespread or regional activity during the previous three seasons has ranged from 49 to 50 jurisdictions.	One hundred fifteen deaths associated with laboratory-confirmed influenza virus infections occurring from October 3, 2010 – May 21, 2011 among children aged <18 years during the 2010-11 influenza season were reported to CDC. 16 children were aged <6 months, 17 were aged 6-23 months, 21 were aged 2-4 years, 32 were aged 5-11 years, and 29 were aged 12-17 years. Of the 115 deaths, 44 were associate…	Based on FluSurv-NET surveillance data, the cumulative hospitalization rate (per 100,000 population) for October 1, 2010--April 30, 2011, was 43.8 among children aged 0--4 years, 8.9 among children aged 5--17 years. Based on EIP data alone, the cumulative hospitalization rate (per 100,000) for October 1, 2010--April 30, 2011, was 38.5 among children aged 0--4 years, 8.0 among children aged 5--17 …	Based on FluSurv-NET surveillance data, the cumulative hospitalization rate (per 100,000 population) for October 1, 2010--April 30, 2011, 11.1 among adults aged 18--49 years, 22.5 among adults aged 50--64 years, and 65.0 among adults aged ≥65 years. Based on EIP data alone, the cumulative hospitalization rate (per 100,000) for October 1, 2010--April 30, 2011, 10.2 among adults aged 18--49 years, …	CDC influenza season summary
2011-12	Mild	Compared with the previous season (2010-11), there were lower rates of hospitalization observed in all age groups, and the percentage of outpatient visits for influenza-like illness (ILI) was lower than during the 2010-11 influenza season. Nationally, influenza A (H3) was the predominant virus throughout the season, although influenza A 2009 H1N1 and influenza B also circulated.	The proportion of specimens that tested positive for influenza during the 2011-2012 season first exceeded 10%, indicating higher levels of virus circulation, during the week ending February 4, 2012 (Week 5). The proportion positive for influenza peaked at 31% during the week ending March 17, 2012 (Week 11), and fell below 10% during the week ending June 9, 2012 (Week 23).	During the 2011-2012 influenza season, the percentage of deaths attributed to pneumonia and influenza (P&I) exceeded the epidemic threshold only during the week ending January 21, 2012 (Week 3). The percentage of deaths attributed to P&I was 7.9% in comparison to the threshold of 7.7%.	The weekly percentage of outpatient visits for ILI to the U.S. Outpatient Influenza-like Illness Surveillance Network (ILINet) only met the national baseline (2.4%) once, the week ending March 17, 2012 (Week 11).	The geographic distribution of influenza activity was most extensive during the week ending in March 17, 2012 (week 11), when 40 jurisdictions reported either regional or widespread influenza activity. The peak number of jurisdictions reporting widespread or regional activity in a single week during the previous three seasons has ranged from 49 to 51.	Thirty-five deaths associated with laboratory-confirmed influenza infections occurred among children aged <18 years during the 2011-2012 influenza season that were reported to the CDC. 6 children were aged <6 months, 2 were aged 6-23 months, 8 were aged 2-4 years, 14 were aged 5-11 years, and 5 were aged 12-17 years. Of the 35 deaths, 10 were associated with 2009 H1N1, 8 with influenza A (H3N2), …	Based on FluSurv-NET surveillance data, the cumulative hospitalization rate (per 100,000 population) for October 1, 2011-April 30, 2012 was 15.8 among children aged 0-4 years, 4.0 among children aged 5-17 years. Based on EIP data alone, the cumulative hospitalization rate (per 100,000 population) for October 1, 2011-April 30, 2012 was 15.0 among children aged 0-4 years, 3.6 among children aged 5-…	Based on FluSurv-NET surveillance data, the cumulative hospitalization rate (per 100,000 population) for October 1, 2011-April 30, 2012 was 4.2 among adults aged 18-49 years, 8.1 among adults aged 50-64 years, and 30.2 among adults aged ≥65 years. Based on EIP data alone, the cumulative hospitalization rate (per 100,000 population) for October 1, 2011-April 30, 2012 was 3.8 among adults aged 18-4…	CDC influenza season summary
2012-13	Severe	This influenza season was moderately severe, with a higher percentage of outpatient visits for influenza-like illness (ILI), higher rates of hospitalization, and more reported deaths attributed to pneumonia and influenza compared with recent years.	The percentage of specimens testing positive for influenza peaked at 38% during week 52 (the week ending December 29, 2012).	From September 30, 2012 to September 28, 2013, the weekly percentage of deaths attributed to pneumonia and influenza ranged from 5.5% to 9.9%, and was elevated above the epidemic threshold for 13 consecutive weeks during the peak of influenza activity from week 1 to week 13 (weeks ending January 5, 2013 and March 30, 2013.	The weekly percentage of outpatient visits for influenza-like illness (ILI) reported to the U.S. Outpatient Influenza-like Illness Surveillance Network (ILINet) peaked at 6.1% during the week ending December 29, 2012 (week 52) and was at or exceeded the national baseline (2.2%) for 17 consecutive weeks, weeks 47—11 (weeks ending November 24, 2012 to March 16, 2013).	Widespread activity was first reported during the week ending November 17, 2012 (week 46). The geographic distribution of influenza activity was most extensive during the week ending January 12, 2013 (week 2), when 50 jurisdictions reported widespread or regional influenza activity (48 reported widespread and 2 reported regional influenza activity).	From September 30, 2012 to September 28, 2013 169 deaths associated with laboratory-confirmed influenza infections occurred among children aged <18 years during the 2012-2013 influenza season and were reported to the CDC. 17 children were aged <6 months, 23 were aged 6-23 months, 22 were aged 2-4 years, 58 were aged 5-11 years, and 49 were aged 12-17 years. Of the 169 deaths, 78 (46%) were associ…	Based on FluSurv-NET surveillance data, the cumulative hospitalization rate (per 100,000 population) for October 1, 2012-April 30, 2013 was 44.4 overall and 66.4 among children aged 0-4 years, 14.5 among children aged 5-17 years.	Based on FluSurv-NET surveillance data, the cumulative hospitalization rate (per 100,000 population) for October 1, 2012-April 30, 2013 was 16.2 among adults aged 18-49 years, 41.3 among adults aged 50-64 years, and 192.4 among adults aged ≥65 years. Influenza-associated hospitalization rates during the 2012-2013 season were higher than in previous years, particularly among aged 65 years and olde…	CDC influenza season summary
2013-14	Moderate	This influenza season was the first since the 2009 pH1N1 pandemic in which pH1N1 viruses predominated and was characterized overall by lower levels of outpatient illness and mortality than influenza A (H3N2)–predominant seasons, but higher rates of hospitalization among adults aged 50–64 years compared with recent years.		During the 2013–14 influenza season, the percentage of deaths attributed to pneumonia and influenza (P&I) exceeded the epidemic threshold for 8 consecutive weeks, from January 11, 2014 to March 1, 2014 (weeks 2–9). The percentage of deaths attributed to P&I peaked at 8.7% during the week ending January 25, 2014 (week 4) (Figure 4). From the 2008–09 influenza season through the 2012–13 season, the…	Nationally, the weekly percentage of outpatient visits for ILI to health-care providers participating in the U.S. Outpatient Influenza-Like Illness Surveillance Network (ILINet) was at or above the national baseline level of 2.0% for 15 consecutive weeks during the 2013–14 influenza season (Figure 2). The peak percentage of outpatient visits for ILI was 4.6%, and occurred in the week ending Decem…	The geographic distribution of influenza activity was most extensive during the week ending January 18, 2014 (week 3), when 41 states reported widespread influenza activity and nine states reported regional influenza activity. The number of jurisdictions reporting widespread or regional activity during the peak week of activity has ranged from 40 to 51 jurisdictions during the previous four influ…	For the 2013–14 influenza season, 96 laboratory-confirmed, influenza-associated pediatric deaths were reported. The deaths included 18 children aged <6 months, 24 aged 6–23 months, eight aged 2–4 years, 27 aged 5–11 years, and 19 aged 12–17 years. Since influenza-associated pediatric mortality became a nationally notifiable condition in 2004, the total number of influenza-associated pediatric dea…	The cumulative hospitalization rate (per 100,000 population) by age group for this period was 46.9 (for 0–4 years), 9.5 (5–17 years). During the past four influenza seasons, age-specific hospitalization rates have ranged from 15.9 to 77.4 (0–4 years), 4.0 to 27.2 (5–17 years).	The cumulative hospitalization rate (per 100,000 population) by age group for this period was 22.0 (18–49 years), 54.3 (50–64 years), and 88.1 (≥65 years). During the past four influenza seasons, age-specific hospitalization rates have ranged from 4.2 to 23.4 (18–49 years), 8.1 to 40.6 (50–64 years), and 25.7 to 183.1 (≥65 years). The cumulative incidence for all age groups for the period October…	“Flu Activity During the 2013-2014 Season.” CDC Website. Last updated August 26, 2014. Accessed on July 19, 2015 at http://www.cdc.gov/flu/pastseasons/1314season.htm.
